# Supplementary material for: A bio-inspired approach for the synthesis of few-layer graphene using beetle defensive gland extract
Source: Royal Society of Chemistry journal article supplement (doi:10.1039/d3ra08733f), 2024-01-01

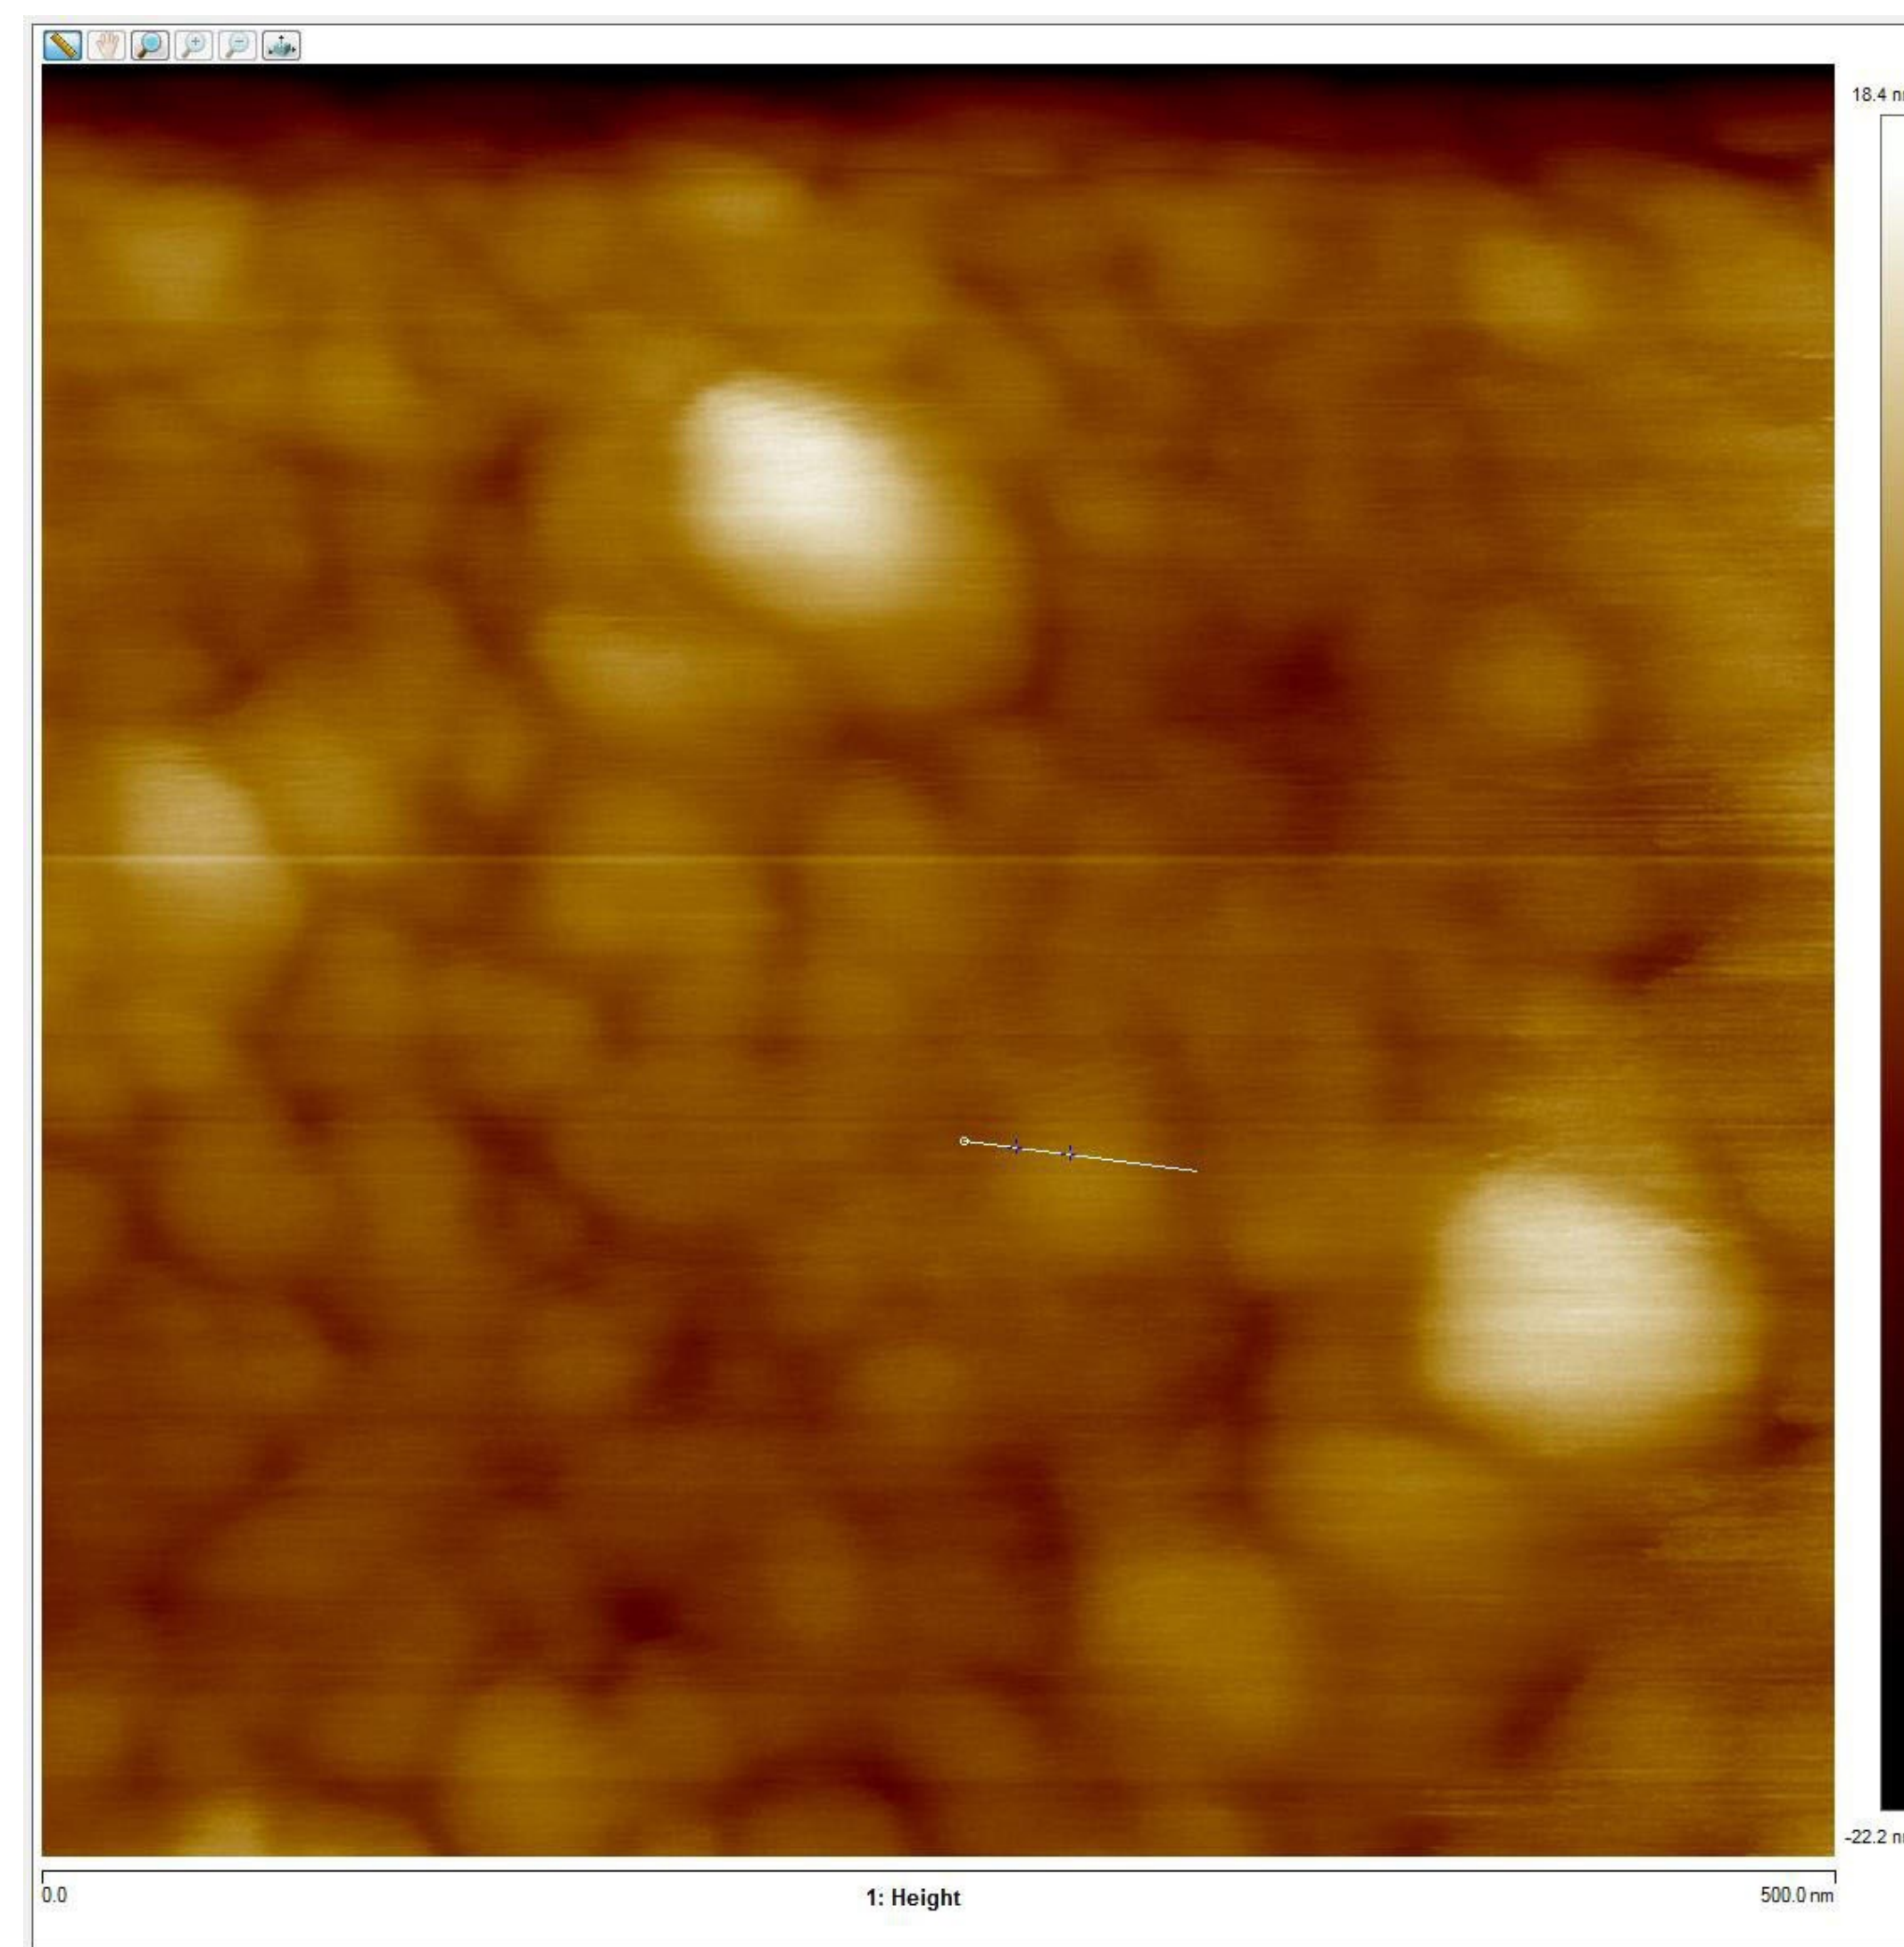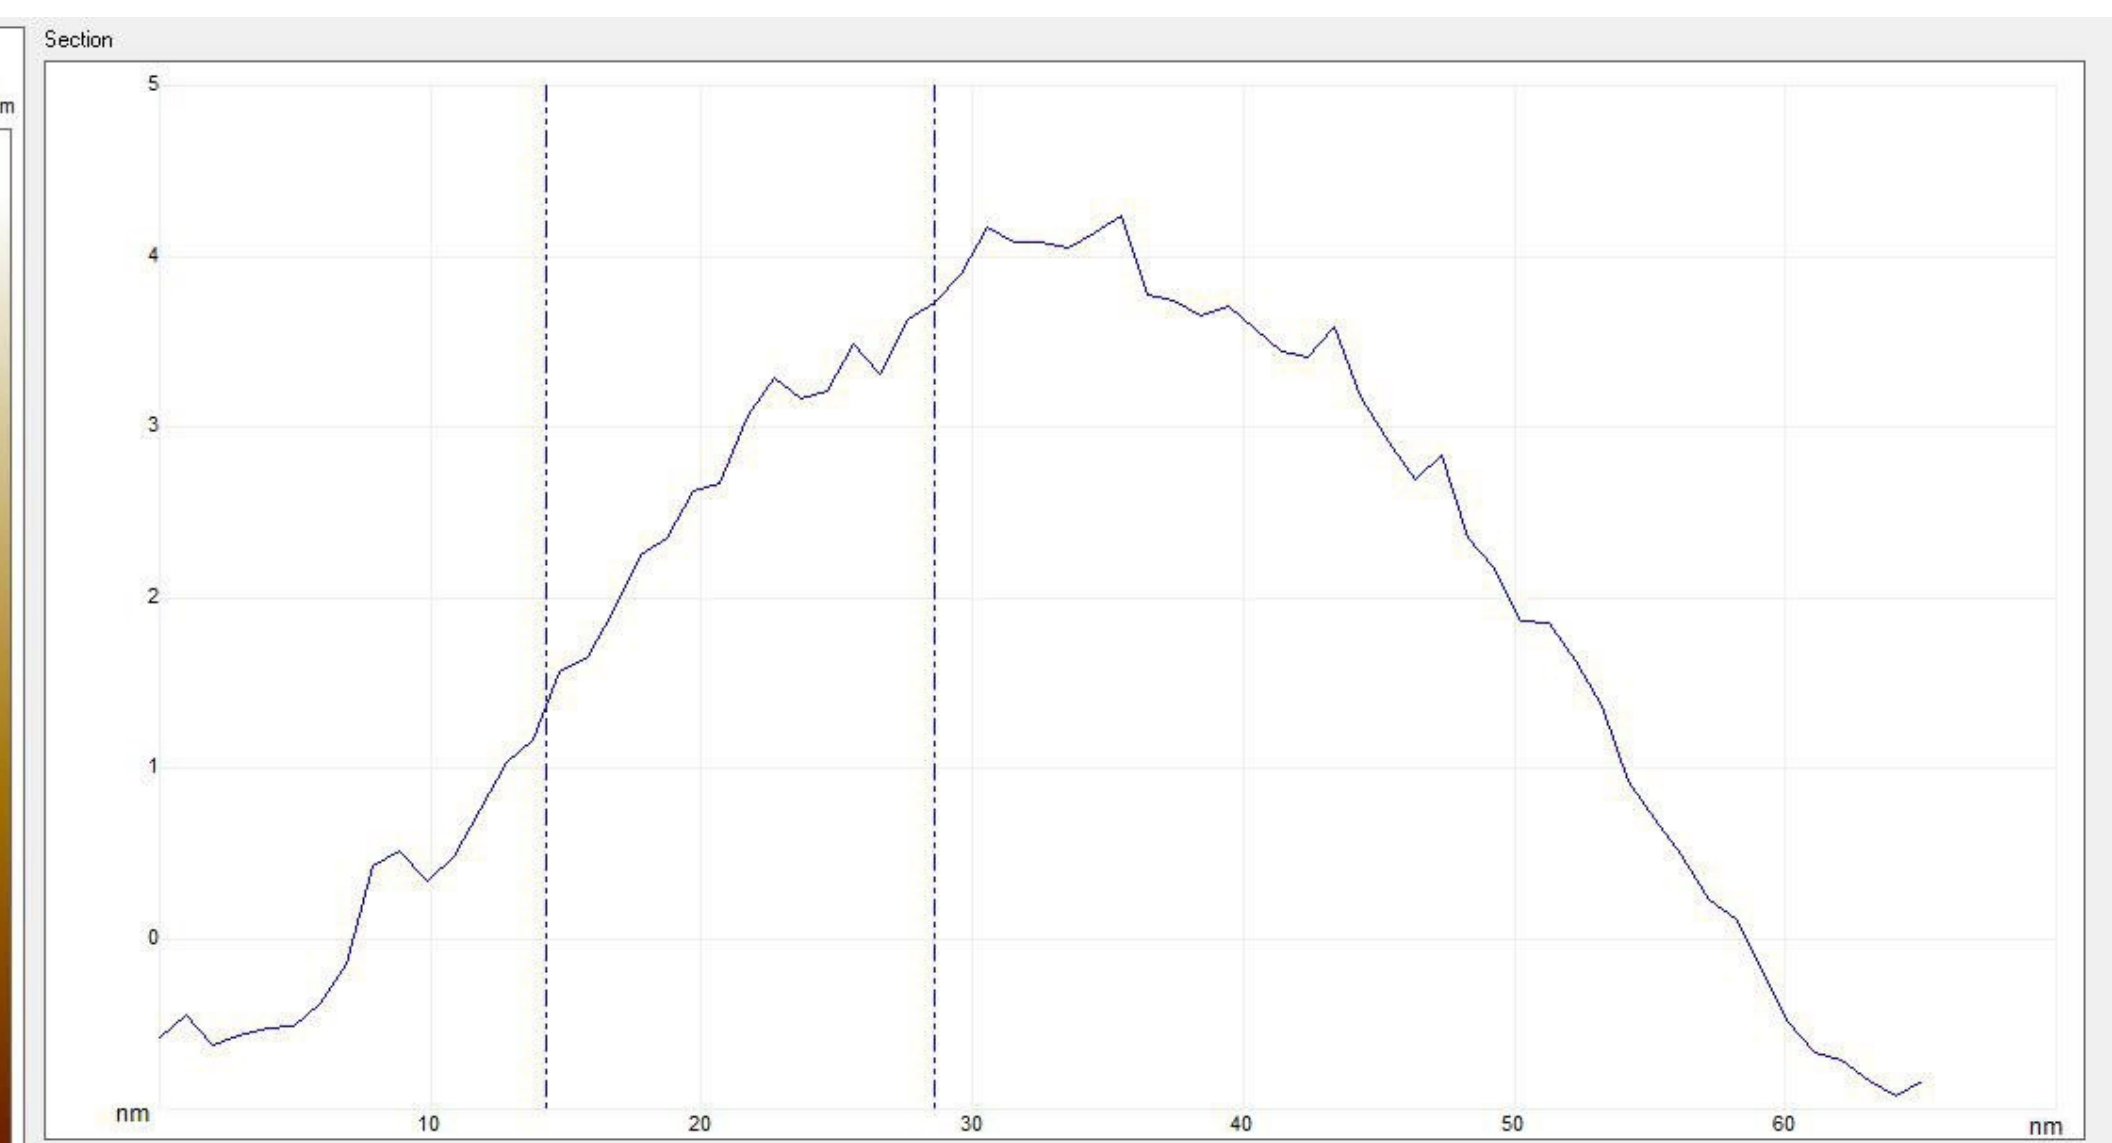

Spectral Period 0.00 nm Spectral Frequency 0.00 /nm  
Spectral RMS Amplitude 2.52 nm Temporal Freq: 0.00 Hz

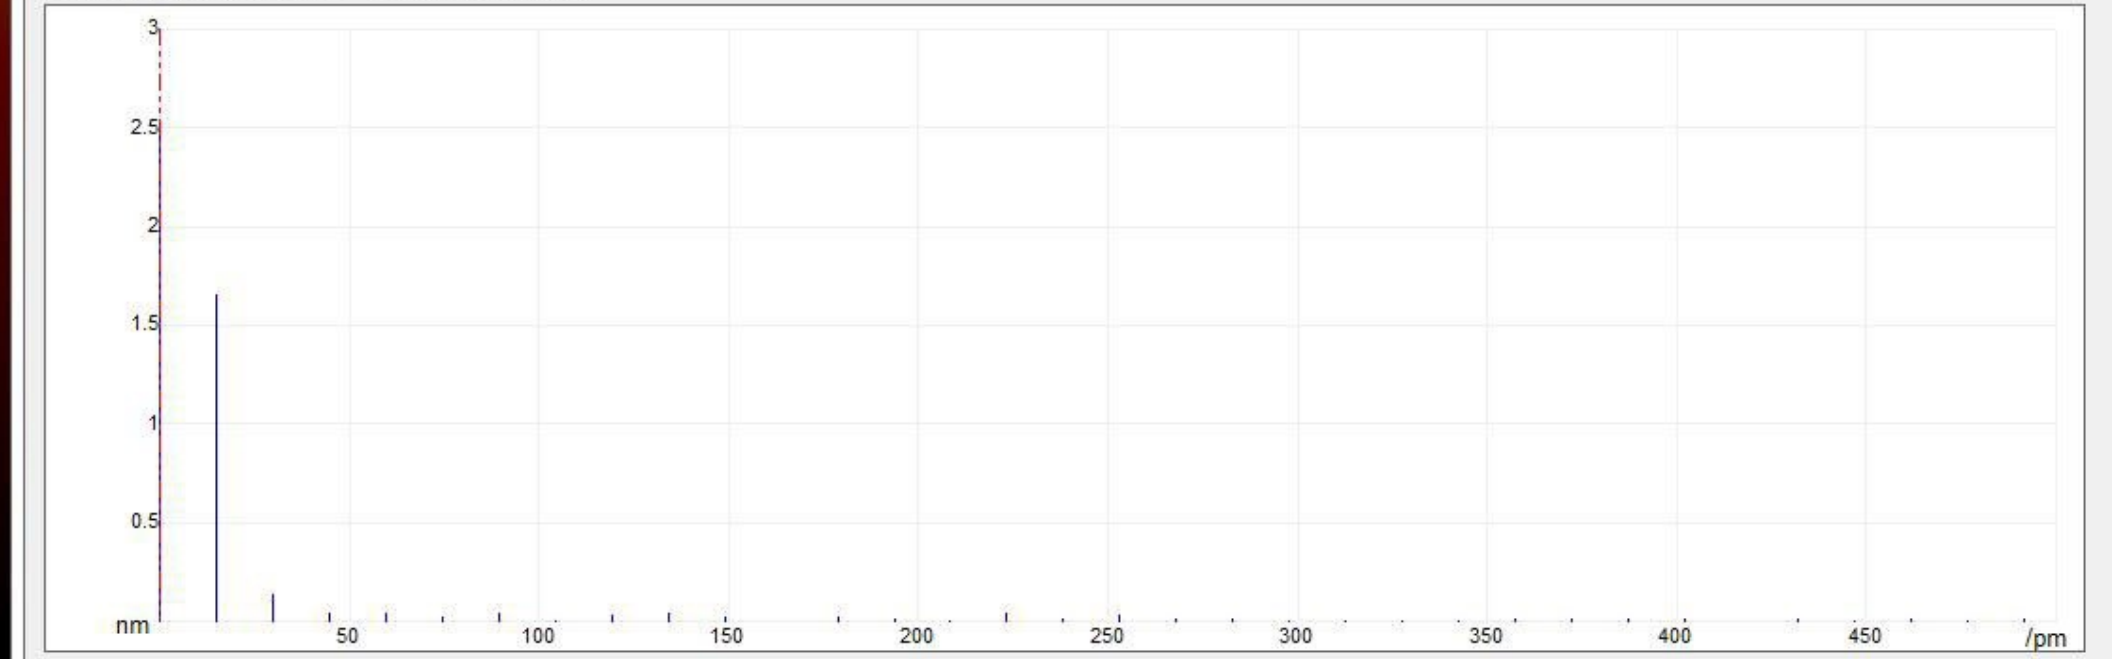

Supplement: d3ra08733f1.pdf [file d3ra08733f1.pdf]
